# Supplementary material
Source: HighWire-hosted journal article supplement (https://bmjopen.bmj.com/content/8/1/e019014)
Supplement: inline-supplementary-material-2 [file inline-supplementary-material-2.pdf]

**Supplemental file S2:** Characteristics of women of reproductive age from RECIPAL cohort in comparison with data extracted from the 2011/2012 Beninese Demographic and Health Survey

|                                         |              | RECIPAL cohort <sup>§</sup><br>(2014-2017) |            | Dansou <i>et al.</i> * <sup>§</sup> (2017) |
|-----------------------------------------|--------------|--------------------------------------------|------------|--------------------------------------------|
|                                         |              | N                                          | % (n)      | %                                          |
| Age (years)                             | ≤ 19         | 1214                                       | 3.2 (38)   | 4.5                                        |
|                                         | 20-24        | 1214                                       | 24.2 (294) | 19.0                                       |
|                                         | 25-29        | 1214                                       | 33.6 (408) | 25.8                                       |
|                                         | 30-34        | 1214                                       | 22.3 (271) | 23.8                                       |
|                                         | ≥ 35         | 1214                                       | 16.7 (203) | 24.2                                       |
| Education attainment                    | No education | 1214                                       | 73.2       | 73.1                                       |
| Household wealth quintiles <sup>†</sup> | Poorest      | 1214                                       | 35.2 (427) | 22.3                                       |
|                                         | Poorer       | 1214                                       | 23.1 (281) | 21.6                                       |
|                                         | Middle       | 1214                                       | 17.4 (211) | 21.6                                       |
|                                         | Richer       | 1214                                       | 12.4 (150) | 19.5                                       |
|                                         | Richest      | 1214                                       | 11.9 (145) | 15.0                                       |
| Gravidity                               | 0            | 1214                                       | 8.8 (107)  | -                                          |
|                                         | 1            | 1214                                       | 13.8 (167) | 18.4                                       |
|                                         | 2-4          | 1214                                       | 47.6 (578) | 51.5                                       |
|                                         | ≥ 5          | 1214                                       | 29.8 (362) | 30.1                                       |
| Mass media exposure                     | None         | 1214                                       | 44.1 (536) | 45.2                                       |
|                                         | Average      | 1214                                       | 37.5 (455) | 32.6                                       |
|                                         | Higher       | 1214                                       | 18.4 (223) | 22.2                                       |

\* N= 8,701. Data extracted from the 2011-2012 national Beninese Demographic and Health Survey (DHS-IV);

Dansou J, Adekunle AO, Arowojolu AO. Factors associated with antenatal care services utilisation patterns amongst reproductive age women in Benin Republic: An analysis of 2011/2012 Benin Republic's Demographic and Health Survey data. Niger Postgrad Med J 2017;24:67-74

§ Women aged 18 to 45 years and 15 to 49 years old in the RECIPAL study and DHS-IV, respectively.

† Household wealth was approximated using a synthetic score combining occupation and ownership of assets in RECIPAL study, and by using principal component analysis in Dansou's article; it was then categorized according to the quintiles.
