# Supplementary material
Source: HighWire-hosted journal article supplement (https://bmjopen.bmj.com/content/8/1/e019014)
Supplement: inline-supplementary-material-5 [file inline-supplementary-material-5.pdf]

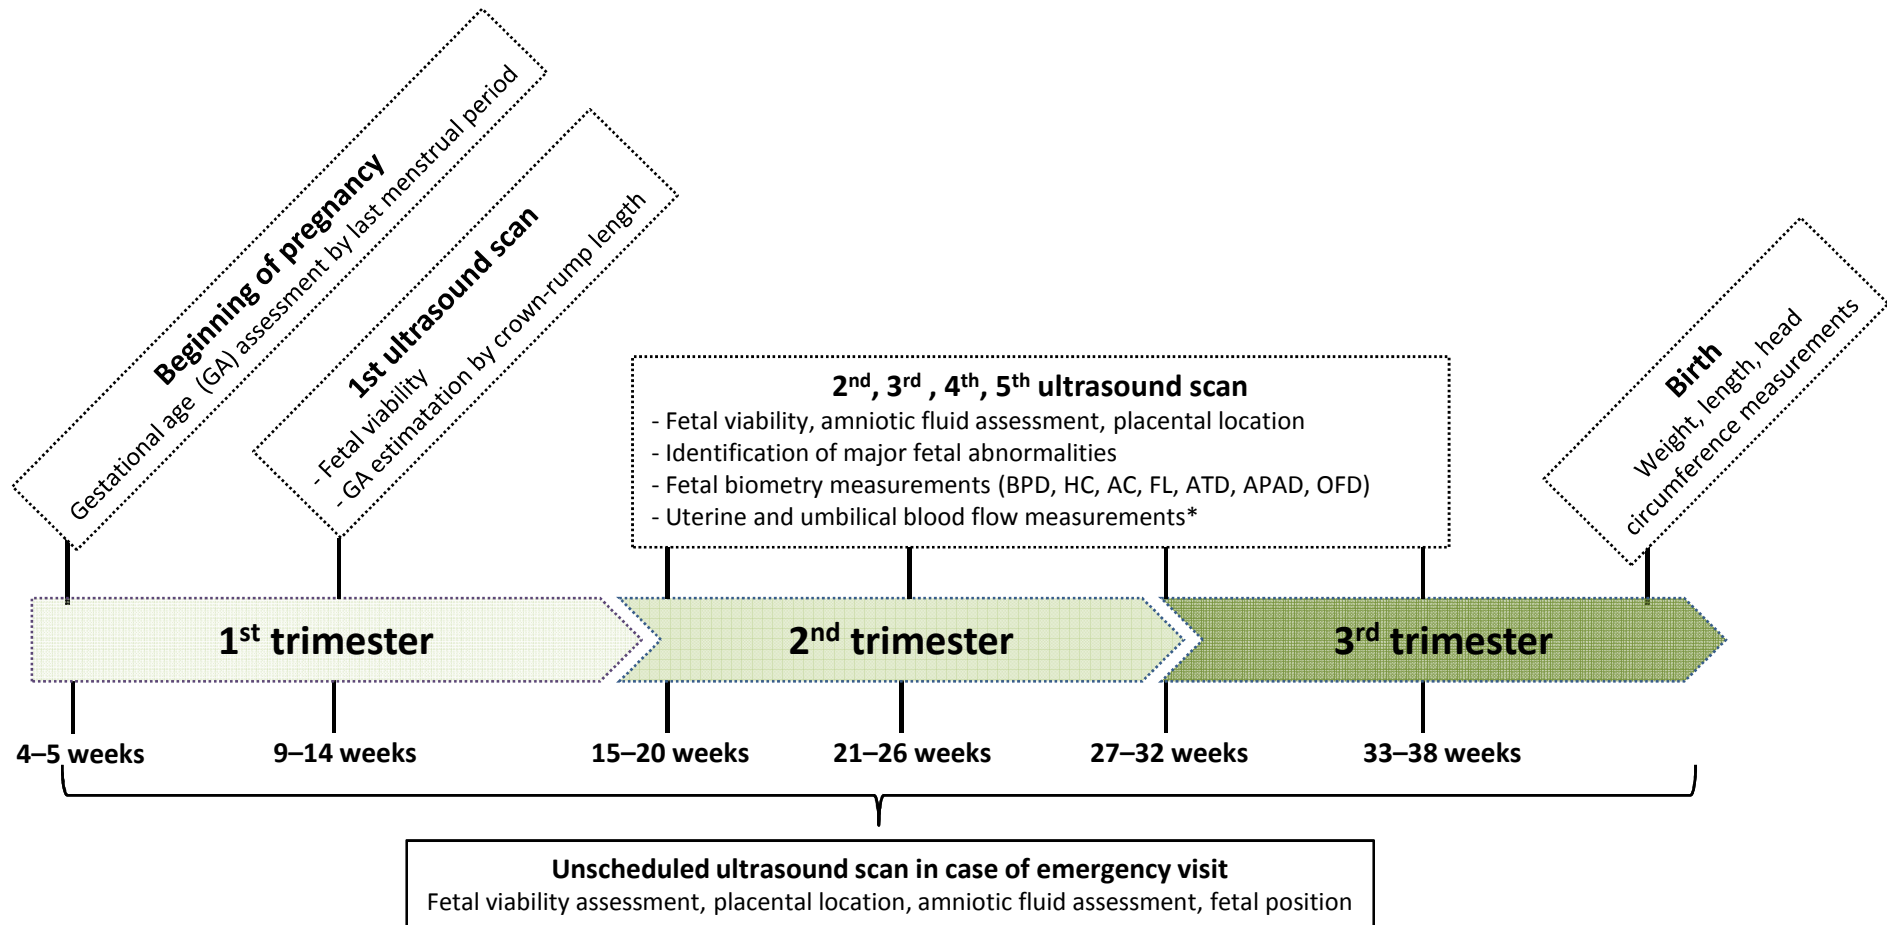

### Supplemental file S5. Ultrasound follow-up (RECIPAL study)

HC: Head circumference; AC: Abdominal circumference; FL: Femur length; BPD: Biparietal diameter; OFD: occipito frontal diameter;  
 ATD: Abdominal transverse diameter; APAD: Antero-posterior abdominal diameter.

\* Uterine, and umbilical blood flows were measured at 21-25 wg and from 28 wg, respectively
